# Supplementary material for: Synthesis and solution stability of water-soluble κ2N,κO-bis(3,5-dimethylpyrazolyl)ethanol manganese(i) tricarbonyl bromide (CORM-ONN1)
Source: Royal Society of Chemistry journal article supplement (doi:10.1039/c6dt03551e), 2017-01-01
Supplement: c6dt03551e1.pdf [file c6dt03551e1.pdf]

# Supporting Information

## Synthesis and Solution Stability of Water-Soluble $\kappa^2N,\kappa O$ -Bis(3,5-dimethylpyrazolyl)ethanol manganese(I) tricarbonyl bromide (CORM-ONN1)

Ralf Mede,<sup>a</sup> Juliane Traber,<sup>a</sup> Moritz Klein,<sup>b,c</sup> Helmar Görls,<sup>a</sup> Guido Gessner,<sup>d</sup> Patrick Hoffmann,<sup>c,e</sup> Michael Schmitt,<sup>b,c</sup> Jürgen Popp,<sup>b,c,e</sup> Stefan H. Heinemann,<sup>d</sup> Ute Neugebauer,<sup>b,c,e</sup> Matthias Westerhausen<sup>\*,a</sup>

### Content:

Figures S1-S12: NMR spectra of new compounds

Figures S13 and S14: MS spectra of the degradation product **4**

Figure S15: Amount of CO released in the gas phase per CORM as a function of the reaction time

Figures S16-S18: Myoglobin assays at different wavelengths

Figure S19: UV-VIS spectrum of CORM-ONN1

Table S1: Max. CO per CORM by irradiation with different wavelengths

Figures S20-S22: Molecular structure representations of **1B** and **4**

Figure S23: Molecular structure of 2,2-bis(3,5-dimethylpyrazolyl)ethanol

Table S2: Crystal data and refinement details for the X-ray structure determinations

**[Bis(3,5-dimethyl-1-pyrazolyl)methane]Mn(CO)<sub>3</sub>Br**

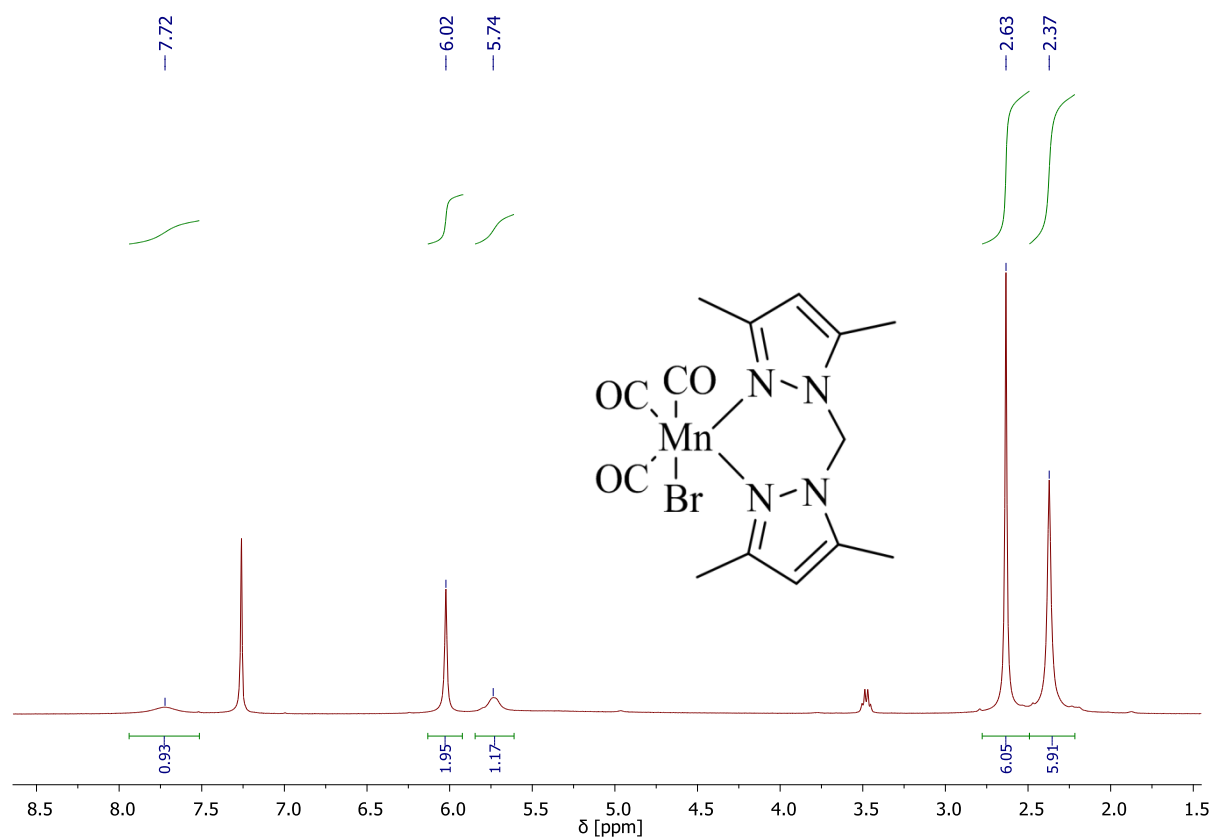

**Figure S1:** <sup>1</sup>H-NMR spectrum of [Bis(3,5-dimethyl-1-pyrazolyl)methane]Mn(CO)<sub>3</sub>Br in CDCl<sub>3</sub>.

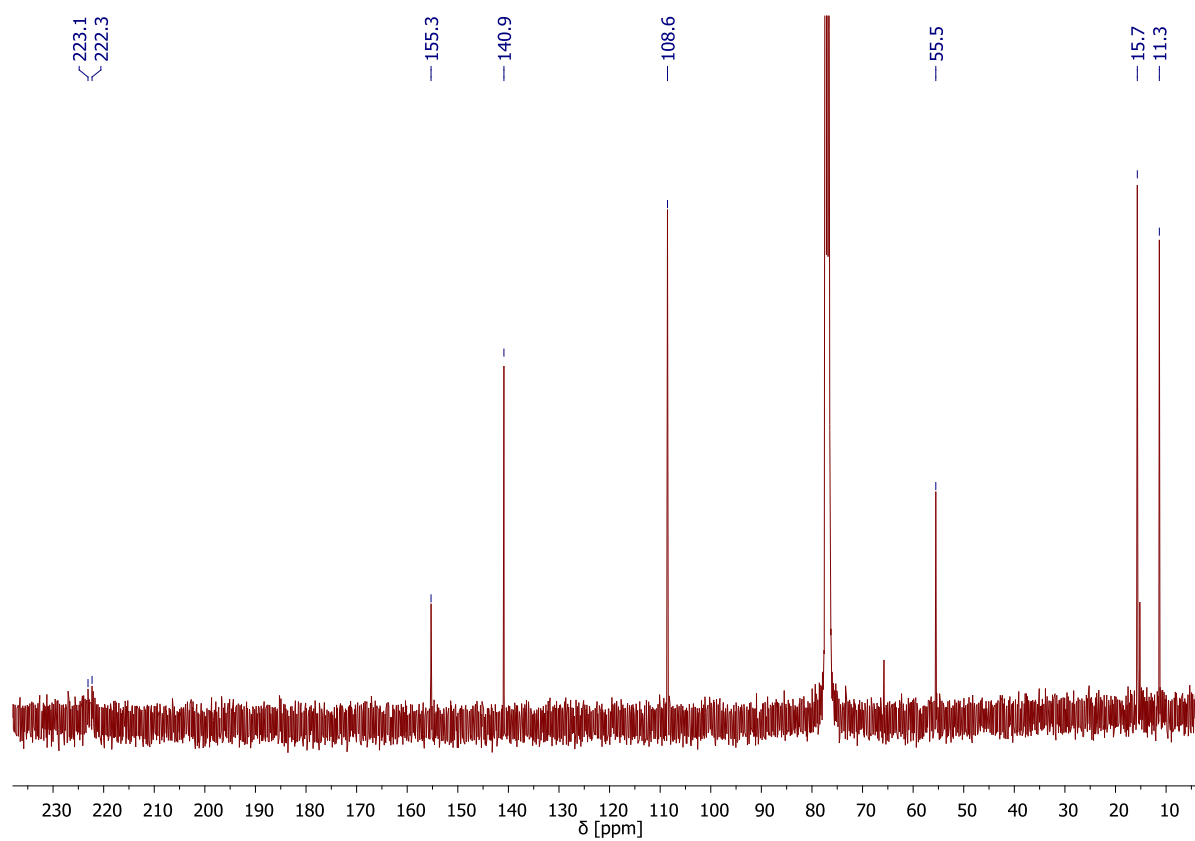

**Figure S2:** <sup>13</sup>C{<sup>1</sup>H}-NMR spectrum of [Bis(3,5-dimethyl-1-pyrazolyl)methane]Mn(CO)<sub>3</sub>Br in CDCl<sub>3</sub>.

**[Bis(3,5-dimethylpyrazol-1-yl)acetato]Mn(CO)<sub>3</sub>**

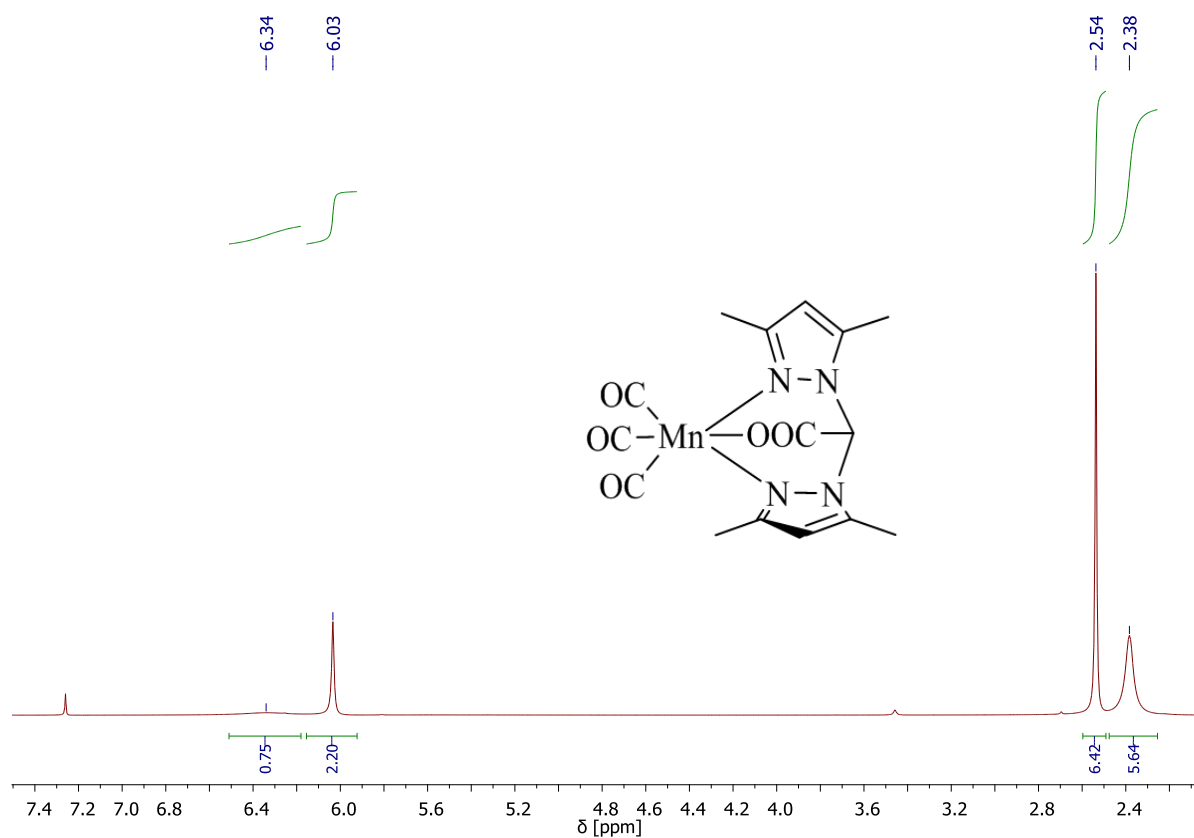

**Figure S3:** <sup>1</sup>H-NMR spectrum of [Bis(3,5-dimethylpyrazol-1-yl)acetate]Mn(CO)<sub>3</sub> in CDCl<sub>3</sub>.

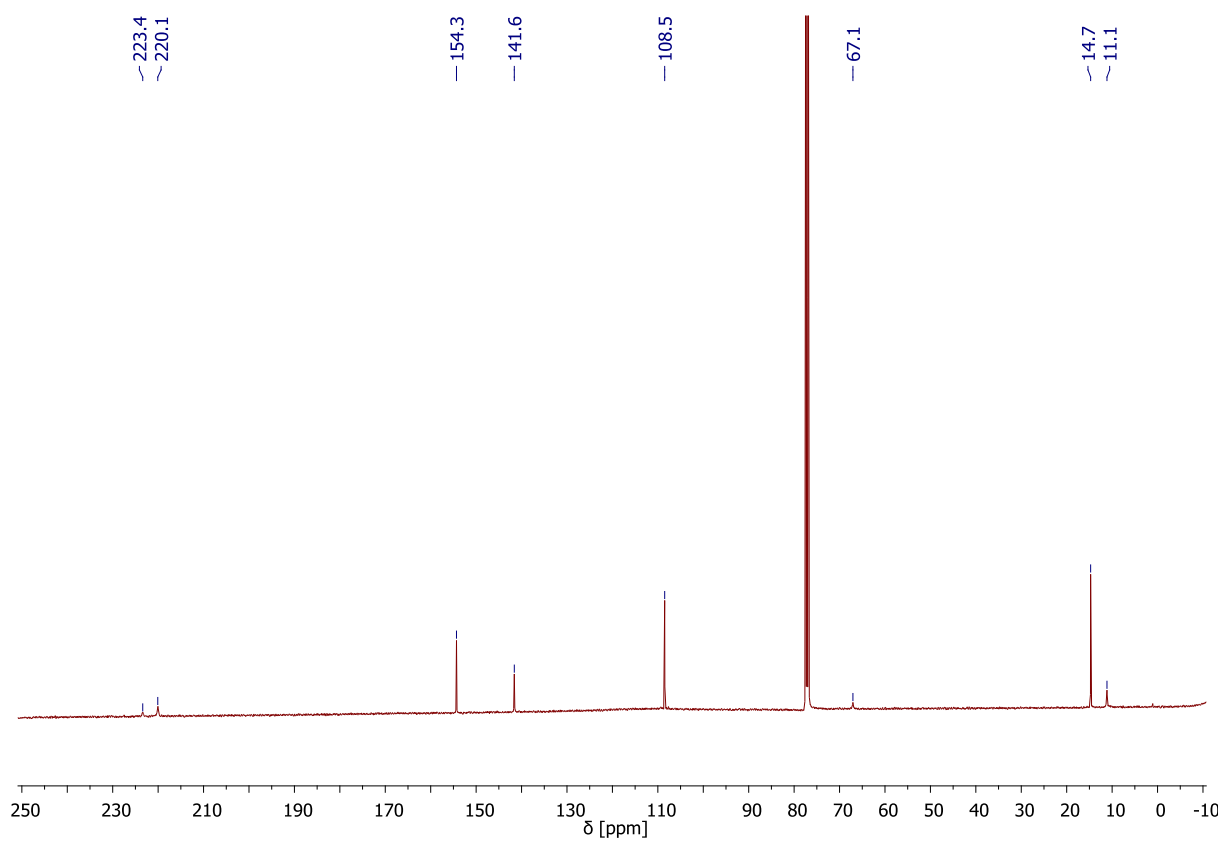

**Figure S4:** <sup>13</sup>C{<sup>1</sup>H}-NMR spectrum of [Bis(3,5-dimethylpyrazol-1-yl)acetate]Mn(CO)<sub>3</sub> in CDCl<sub>3</sub>.

## 2,2-Bis(3,5-dimethylpyrazol-1-yl)ethanol

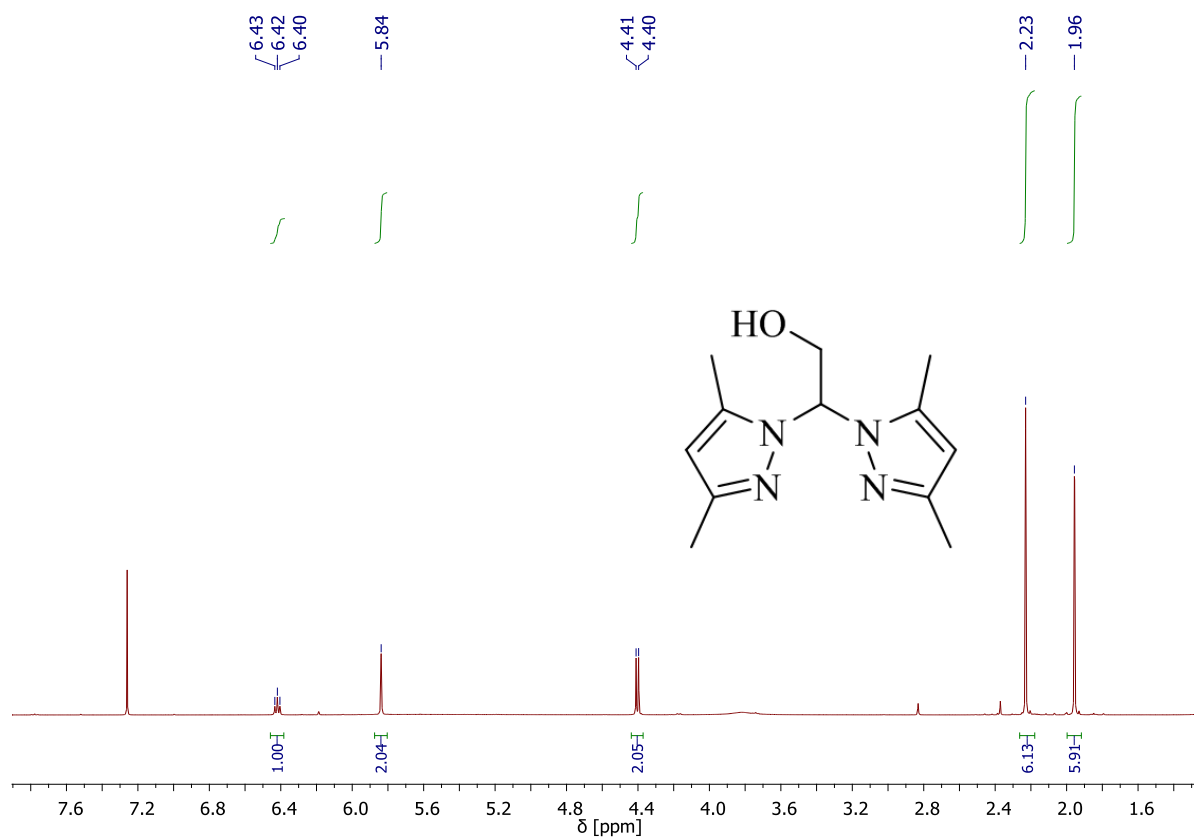

Figure S5: <sup>1</sup>H-NMR spectrum of 2,2-bis(3,5-dimethylpyrazol-1-yl)ethanol in CDCl<sub>3</sub>.

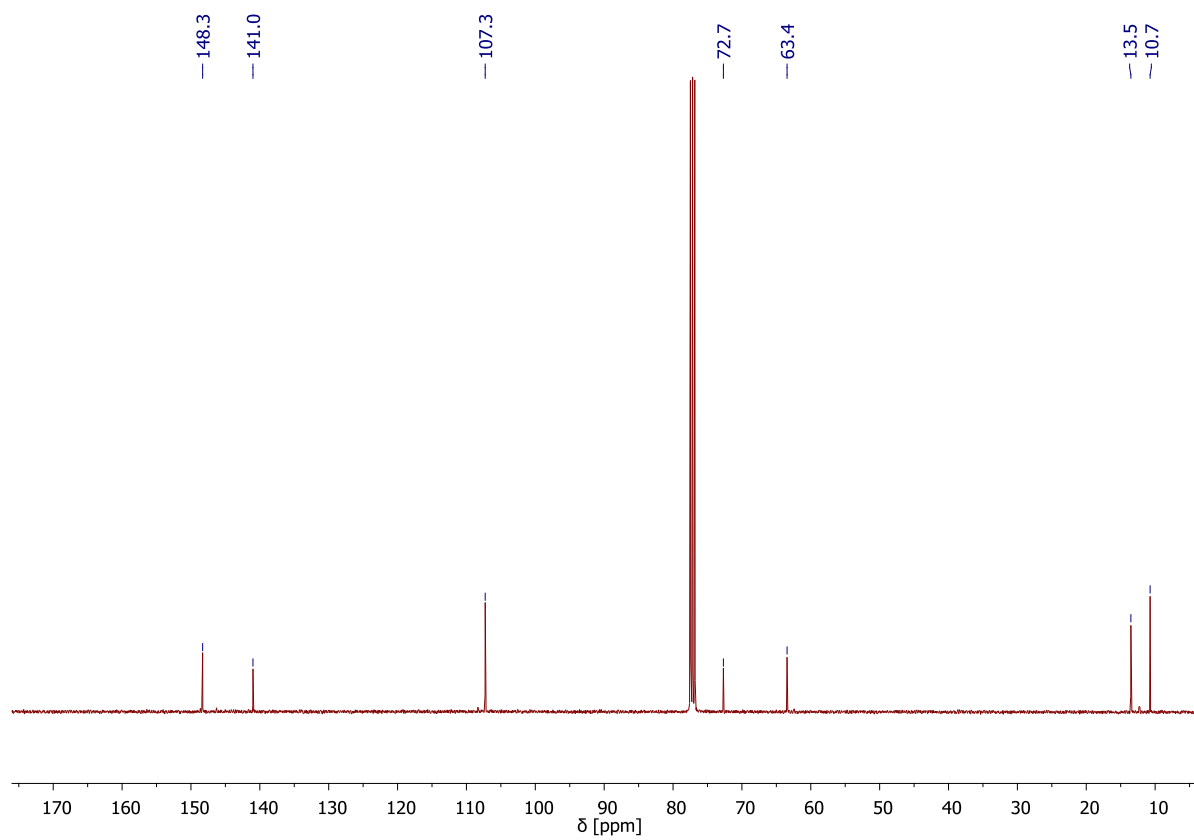

Figure S6: <sup>13</sup>C{<sup>1</sup>H}-NMR spectrum of 2,2-bis(3,5-dimethylpyrazol-1-yl)ethanol in CDCl<sub>3</sub>.

**[[2,2-Bis(3,5-dimethylpyrazol-1-yl)ethanol]Mn(CO)<sub>3</sub>]Br (CORM-ONN1, 3)**

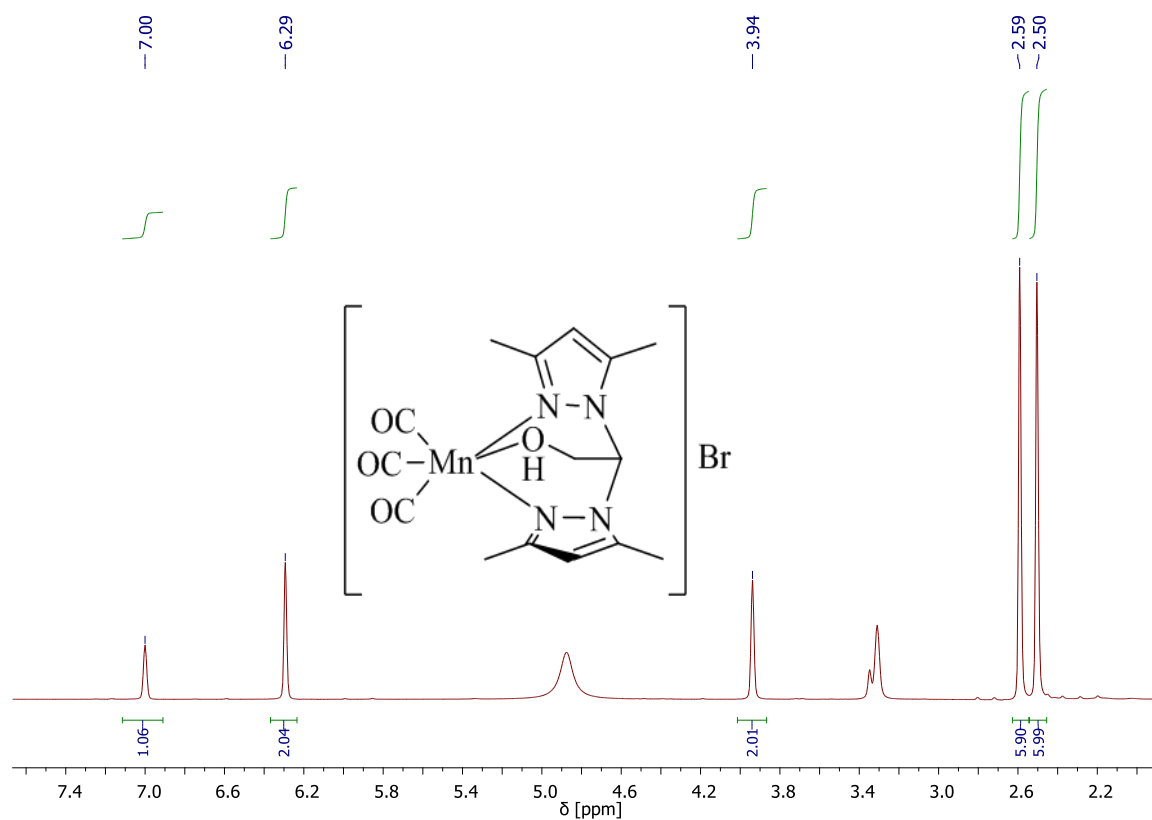

**Figure S7:** <sup>1</sup>H-NMR spectrum of [{Bis(3,5-dimethylpyrazol-1-yl)ethanol}Mn(CO)<sub>3</sub>]Br in CD<sub>3</sub>OD.

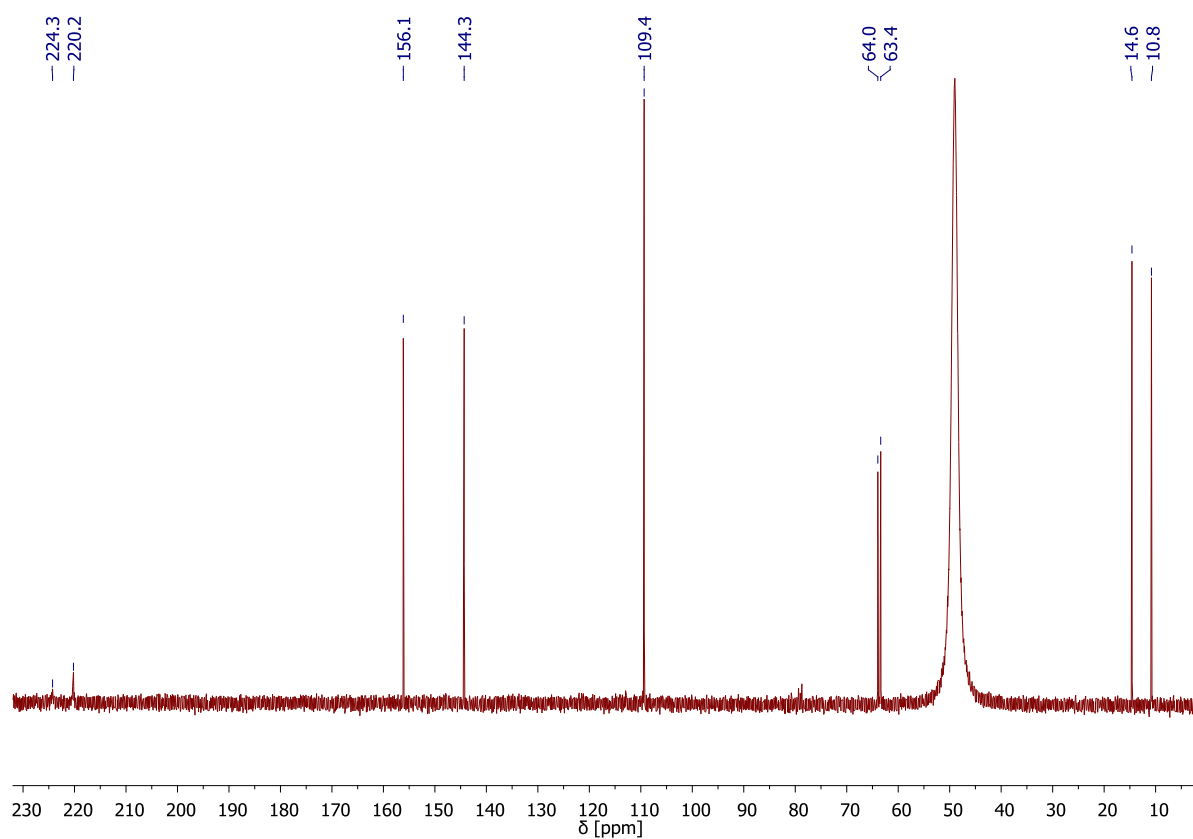

**Figure S8:** <sup>13</sup>C{<sup>1</sup>H}-NMR spectrum of [{Bis(3,5-dimethylpyrazol-1-yl)ethanol}Mn(CO)<sub>3</sub>]Br in CD<sub>3</sub>OD.

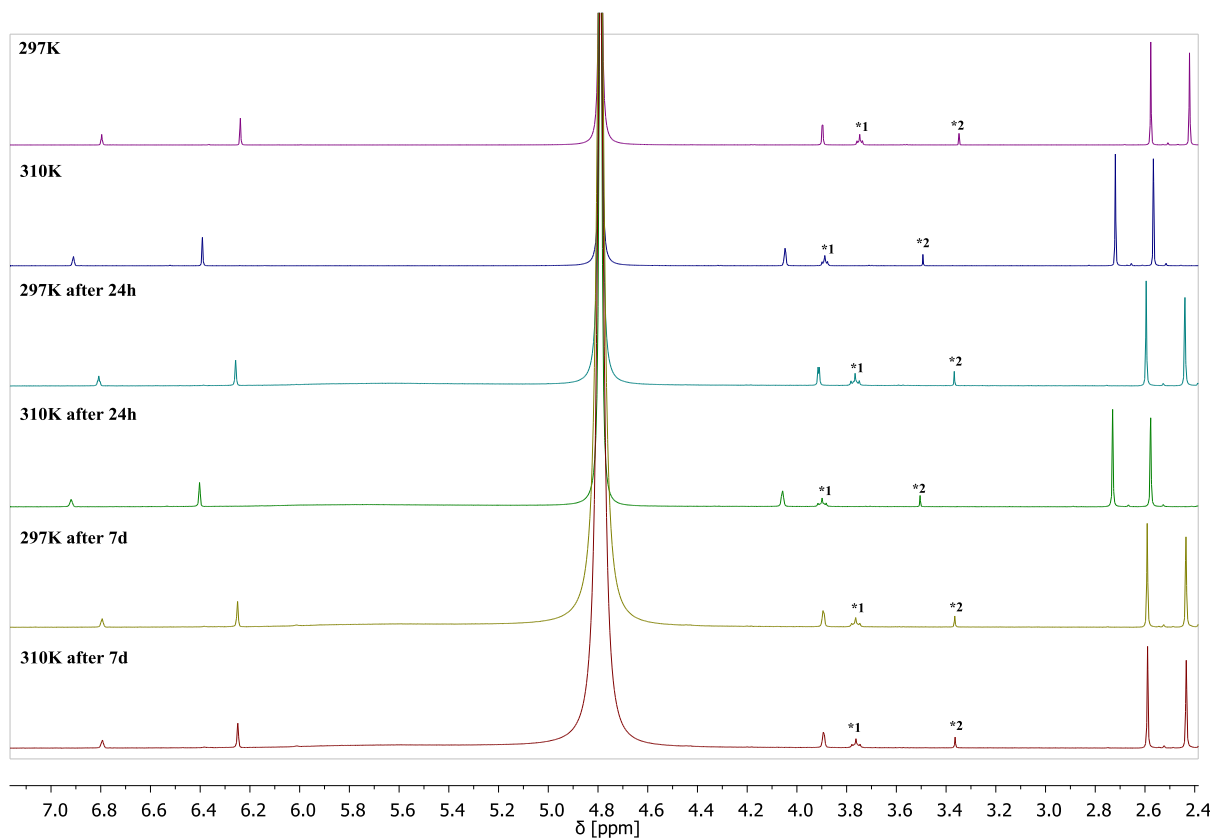

**Figure S9:** <sup>1</sup>H-NMR of CORM-ONN1 (**3**) in D<sub>2</sub>O after 0h, 24h, and 7d at 297K and 310K; \*1 = THF, \*2 = MeOH.

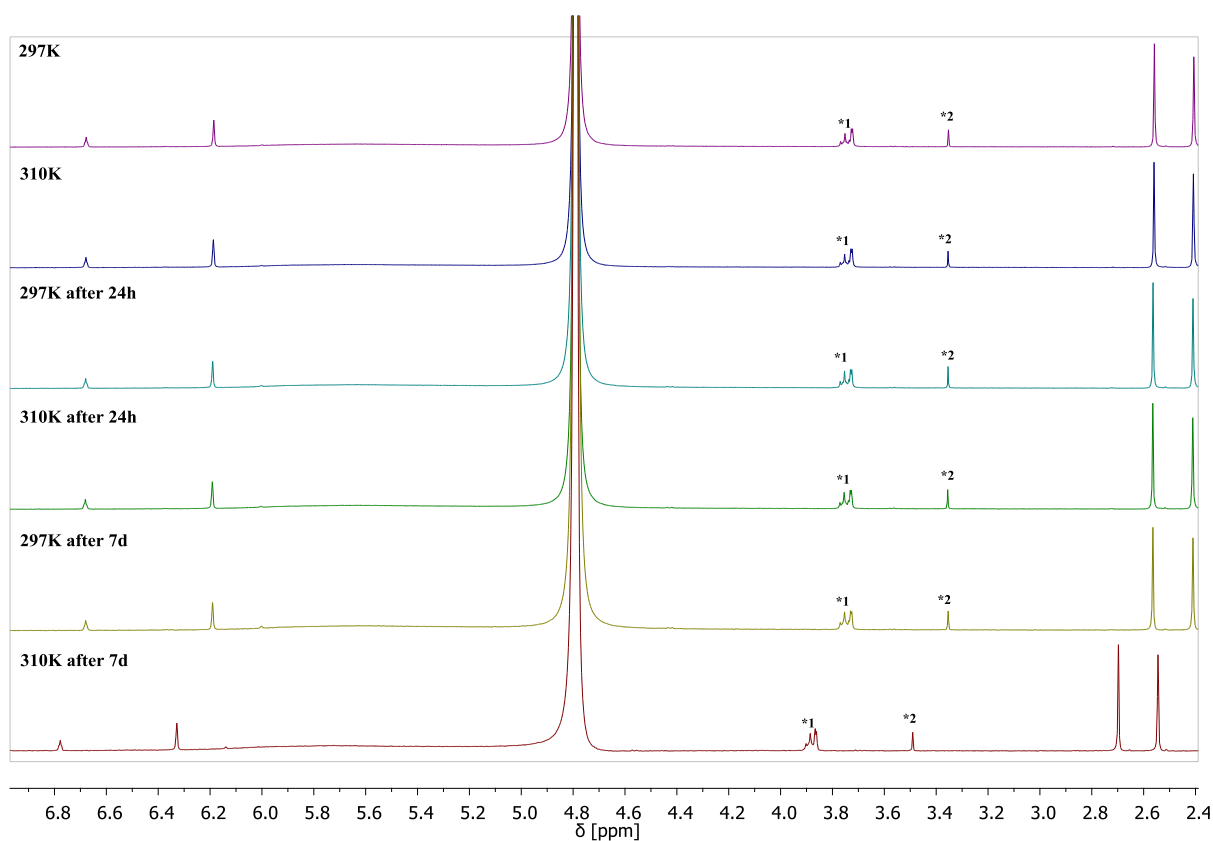

**Figure S10:** <sup>1</sup>H-NMR of CORM-ONN1 (**3**) in D<sub>2</sub>O containing PBS after 0h, 24h, and 7d at 297K and 310K; \*1 = THF, \*2 = MeOH.

**Degradation Product of [ $\{\text{Bis}(3,5\text{-dimethylpyrazol-1-yl)ethanol}\}\text{Mn}(\text{CO})_3\text{Br}\}$  (**4**) in MeOH**

—240.4

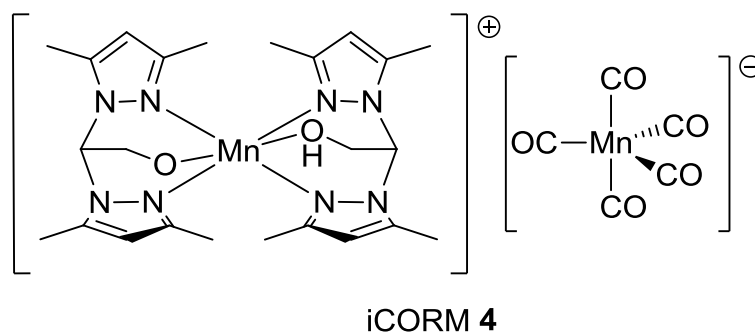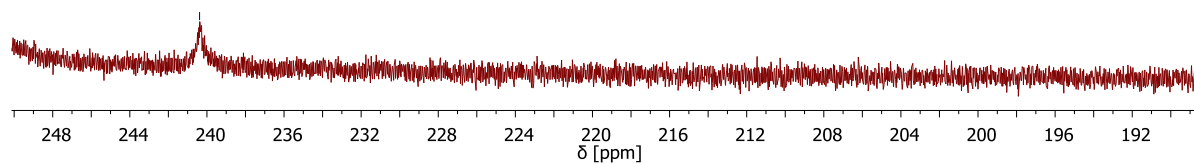

**Figure S11:**  $^{13}\text{C}\{^1\text{H}\}$ -NMR spectrum of the degradation product **4** in  $[\text{D}_8]\text{THF}$ .

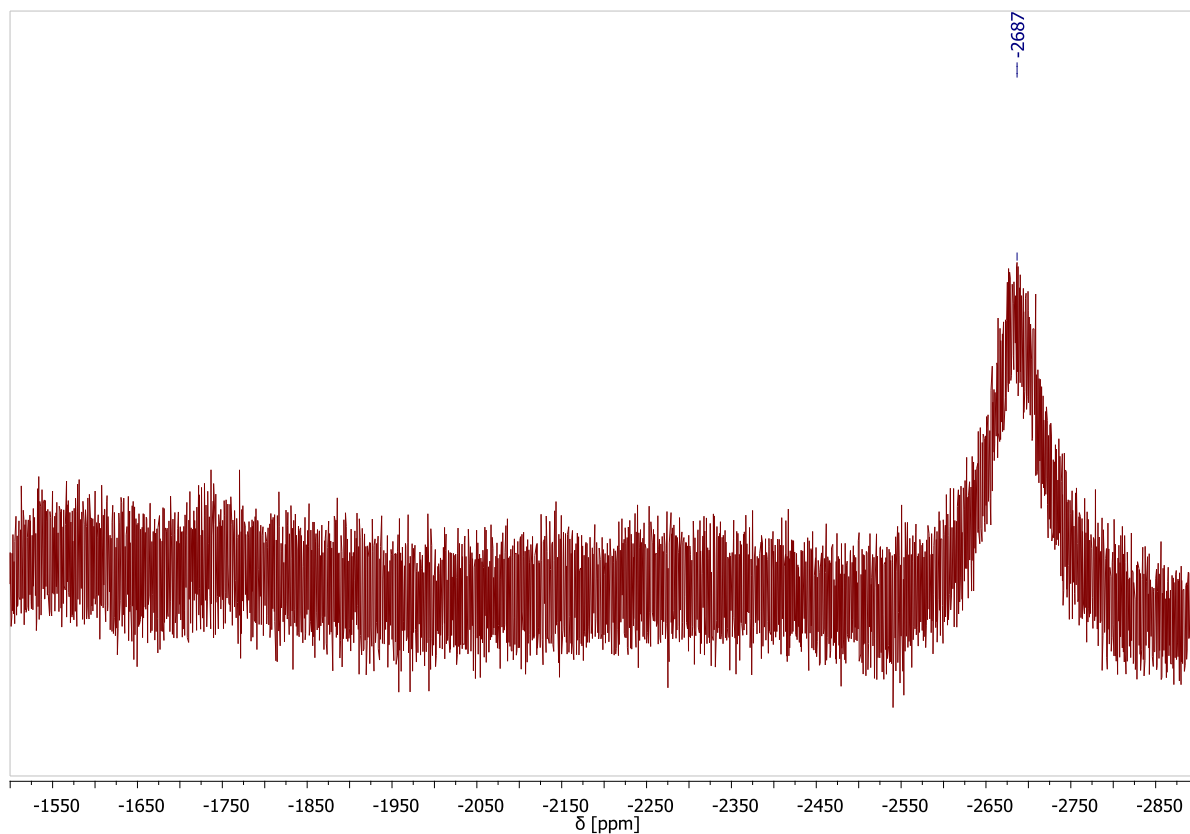

**Figure S12:**  $^{55}\text{Mn}$ -NMR spectrum of the degradation product **4** in  $[\text{D}_8]\text{THF}$ .

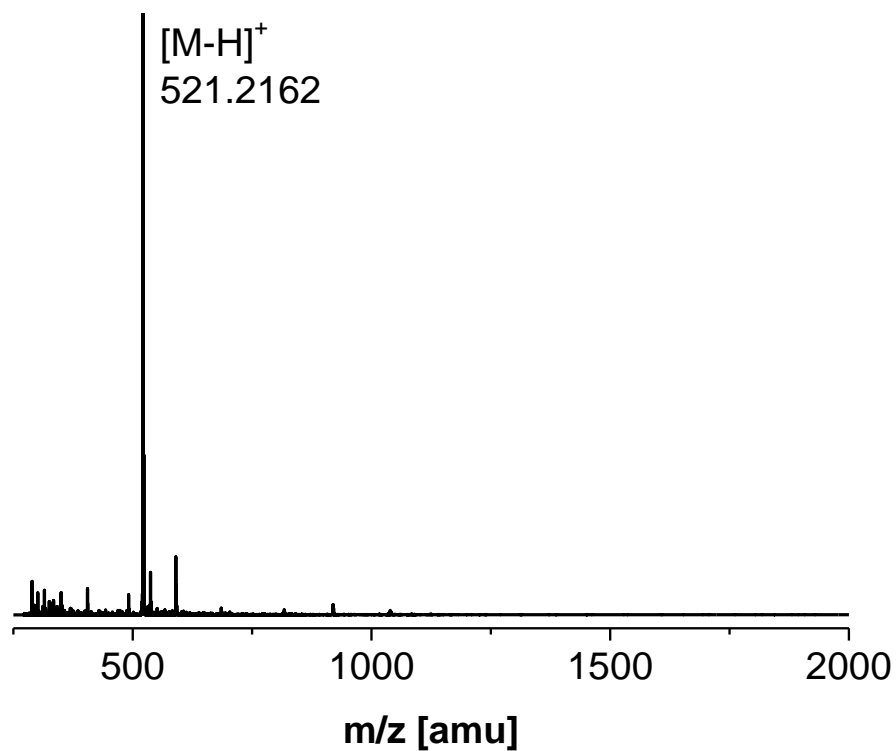

**Figure S13:** ESI-ToF-MS spectrum of **4**.

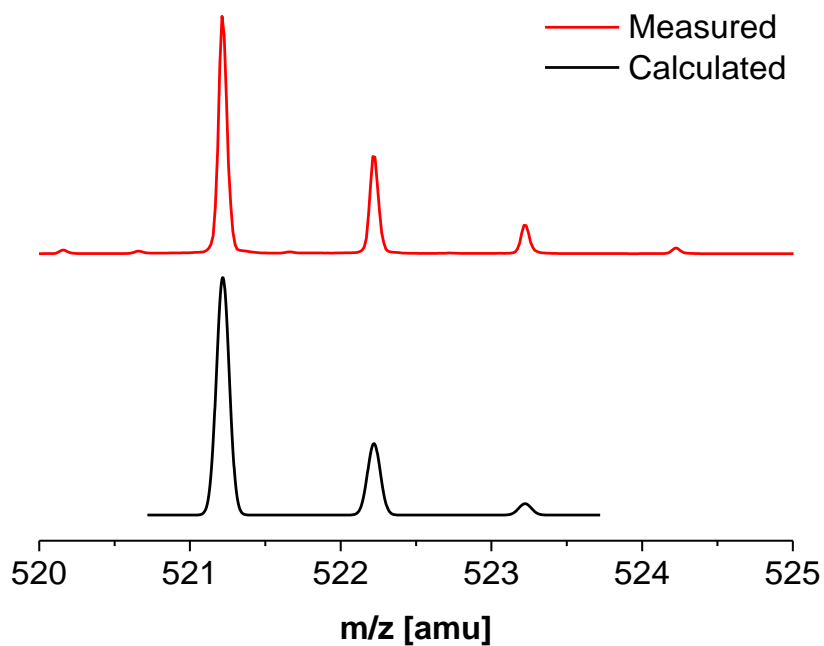

**Figure S14:** Comparison of measured and calculated isotope pattern of the peak of  $[C_{24}H_{34}MnN_8O_2]^+$  of complex **4**.



## CO Release Properties

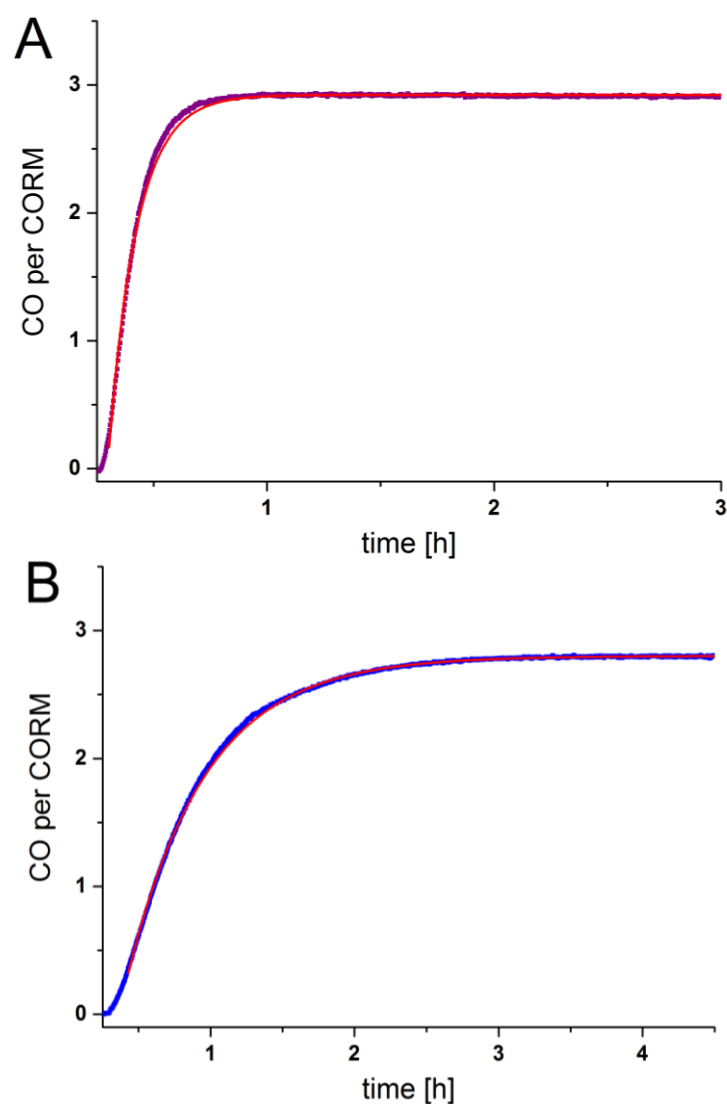

**Figure S15:** Amount of CO released in the gas phase per CORM as a function of the reaction time. The CO amount was measured above solutions of CORM-CONN1. The irradiation with light at 405 nm (**A**) and 470 nm (**B**) was switched on after 15 min. The mono-exponential function  $y_0 + A(1 - e^{-(t-t_0)/\tau})$  representing a first order reaction kinetic was fitted to the data of each measurement. The starting time  $t_0$ , the asymptotic value  $A$  and the time constant  $\tau$  were used as free parameters, while the offset  $y_0$  was set to the value determined before the beginning of the irradiation. The starting time  $t_0$  is the sum of the time starting the irradiation and a delay caused by diffusion (see: M. Klein, U. Neugebauer, A. Gheisari, A. Malassa, T. Jazzazi, F. Froehlich, M. Westerhausen, M. Schmitt, J. Popp, *J. Phys. Chem. A* **2014**, *118*, 5381-5390). The calculated time constants for CORM-ONN1 are means  $\pm$  confidence intervals of 95%. For a better overview only the average values for each irradiation wavelength are shown. It is assumed that the irradiation intensity is constant during the entire reaction. A decrease of the irradiation intensity of less than 7% due to absorption by the CORM is assumed to not affect the profile of the first order reaction kinetic.

## Myoglobin Assays

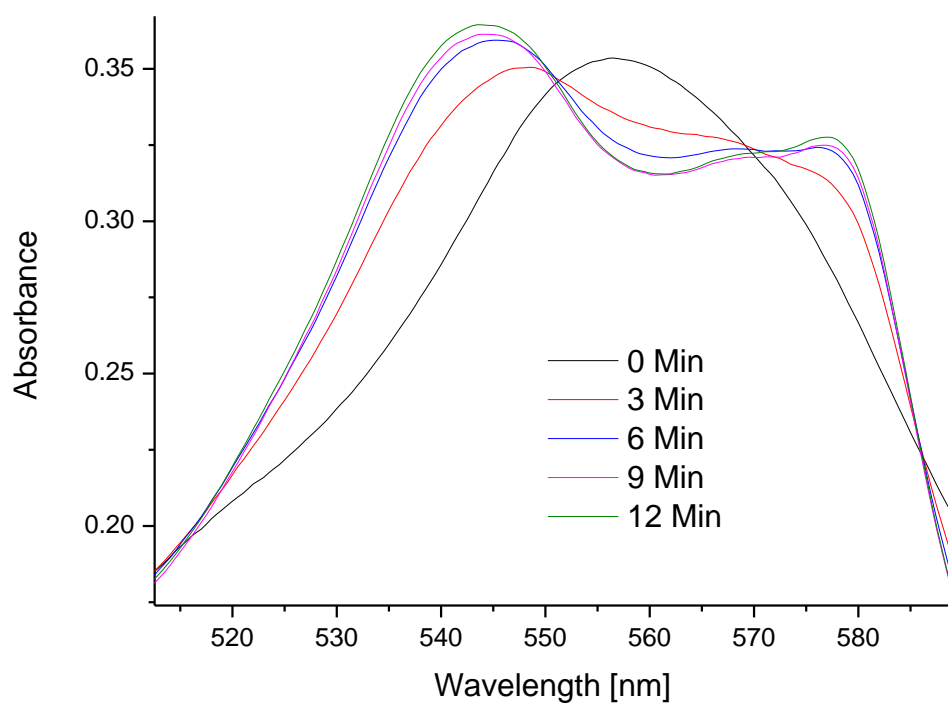

**Figure S16:** Myoglobin assay of CORM-ONN1 (irradiation with 365 nm, P = 1.58 mW).

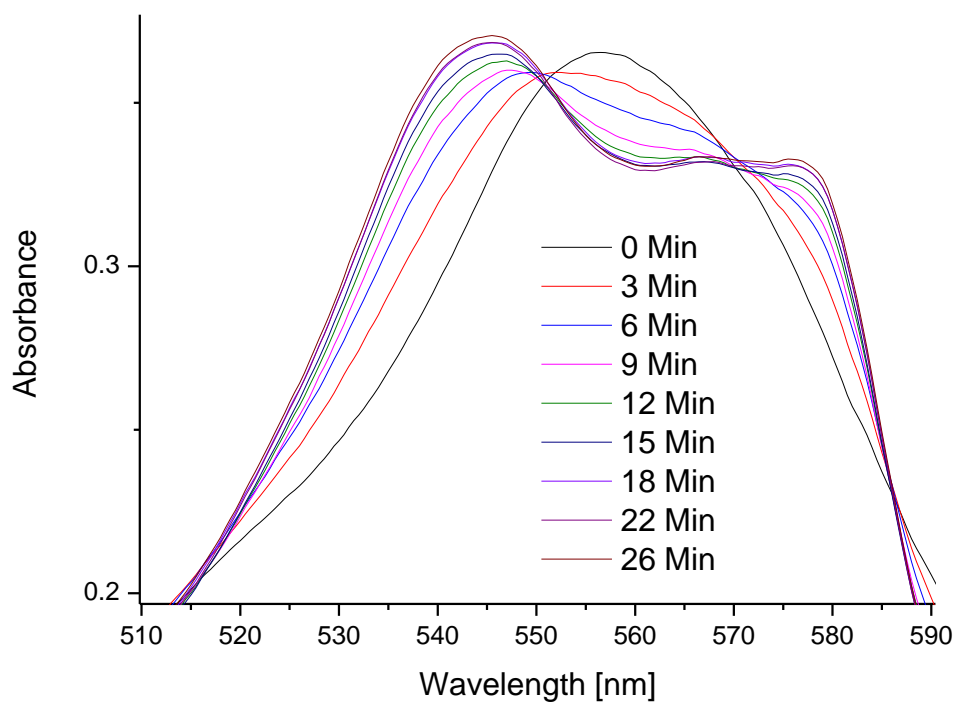

**Figure S17:** Myoglobin assay of CORM-ONN1 (irradiation with 405 nm, P = 2.48 mW).

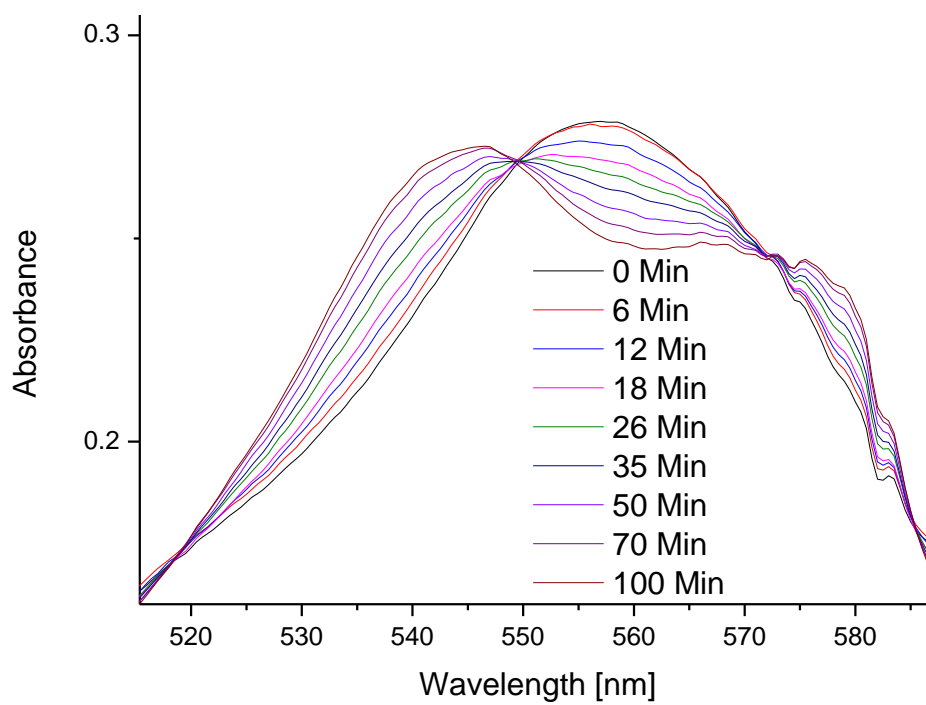

**Figure S18:** Myoglobin assay of CORM-ONN1 (irradiation with 480 nm, P = 2.50 mW).

**Table S1:** Max. CO per CORM by irradiation with different wavelengths.

| <b>Irradiation with</b> | <b>Max. CO per CORM-ONN1</b> |
|-------------------------|------------------------------|
| 365 nm                  | 1.78                         |
| 405 nm                  | 1.90                         |
| 480 nm                  | 1.37                         |

## UV-Vis Spectrum and Quantum Yield

Calculation of the quantum yield  $\Phi$

$$\begin{aligned}\Phi(\lambda) &= \frac{\text{numbers of events}}{\text{number of photons absorbed}} \\ &= \frac{\text{amount of reactant consumed}}{\text{amount of photons absorbed}} = \frac{\frac{dx}{dt}}{q_0 [1 - 10^{-Abs(\lambda)}]}\end{aligned}$$

where  $\frac{dx}{dt}$  is the rate of change of a measurable quantity,  $q_0$  the amount of photons incident per time interval and  $Abs$  the absorbance (Source: S. E. Braslavsky, *Pure Appl. Chem.* **2007**, 79(3), 293-465, Glossary of terms used in photochemistry, 3<sup>rd</sup> edition (IUPAC Recommendations 2006), pages 406-407).

The UV-VIS spectrum of CORM-ONN1 before and after irradiation in Figure S19 shows that the absorption band with its maximum at 360 nm vanished completely. Thus, also the absorptions of CORM-ONN1 at 405 nm and 470 nm were disappearing during the decay reaction of CORM-ONN1. The intensity difference caused by this decreasing absorption of CORM-ONN1 is neglected for the estimation of the quantum yield. This intensity difference can be up to 13 % (between start and end of reaction) for an irradiation at 405 nm and 0.3 % at 470 nm. Therefore, photons incident per time interval  $q_0$  is assumed to be constant.

When the Beer-Lambert law is applied to describe the absorbance  $Abs$ , the following function for the quantum yield is received depending on the concentration  $c$ .

$$\rightarrow (2.) \quad \Phi(\lambda) = \frac{V \cdot N_A \cdot \frac{dc}{dt}}{q_0 [1 - 10^{-c(t) \cdot \epsilon \cdot l}]}$$

where  $c(t)$  [mol/l] is the CORM concentration in solution at the time  $t$ , while  $l$  [cm] is the path length of the irradiated sample,  $\epsilon(\lambda)$  [ $\text{l} \cdot \text{mol}^{-1} \cdot \text{cm}^{-1}$ ] the extinction coefficient and  $q_0$  [ $\text{s}^{-1}$ ] the number of photons incident per time interval.  $\frac{dc}{dt}$  is the derivation of the concentration at the time point  $t$  and the volume of the solution  $V = A \cdot l$  is given by the base area  $A$  and the path length  $l$ .

The number of photons incident per time interval  $q_0$  [ $\text{s}^{-1}$ ] is calculated by using the irradiation power per area  $I_0$  [ $\text{mW}/\text{cm}^2$ ], the wavelength  $\lambda$  [nm], the base area  $A$  [ $\text{cm}^2$ ], the Planck constant  $h$  [J·s], the speed of light  $c_{light}$  [m/s].

$$\text{with } q_0 = \frac{I_0 \cdot A}{E_{photon}} = \frac{I_0 \cdot A \cdot \lambda}{h \cdot c_{light}} \cdot 10^{-12} \quad \rightarrow \quad \frac{q_0}{A} = \frac{I_0 \cdot \lambda}{h \cdot c_{light}} \cdot 10^{-12}$$

Since all measured absorbance values are smaller than 0.15, we use an approximation for the calculation of the quantum yield  $\Phi(\lambda)$ :

$$10^{-Abs(\lambda)} = e^{-\ln(10) \cdot Abs(\lambda)} \approx 1 - \ln(10) \cdot Abs(\lambda) \quad \text{for } Abs(\lambda) < 0.15$$

$$\rightarrow \Phi(\lambda) \approx \frac{V \cdot N_A \cdot \frac{dc}{dt}}{q_0 [1 - (1 - \ln(10) \cdot Abs(\lambda))]} = \frac{V \cdot N_A \cdot \frac{dc}{dt}}{q_0 \cdot \ln(10) \cdot c(t) \cdot \epsilon \cdot l}$$

We conclude from Figure S15 that the CORM decay reaction can be describe by a first order reaction resulting in the following concentration profile for the starting material:

$$c_{CORM}(t) = c_0 \cdot e^{-\frac{t-t_0}{\tau}} \quad \rightarrow \quad \frac{dc}{dt} = -\frac{1}{\tau} \cdot c$$

$$\rightarrow \quad \Phi(\lambda) \approx \frac{A \cdot l \cdot N_A \cdot \frac{1}{\tau} \cdot c(t)}{q_0 \cdot \ln(10) \cdot c(t) \cdot \epsilon \cdot l} = \frac{N_A}{\frac{q_0}{A} \cdot \ln(10) \cdot \epsilon \cdot \tau}$$

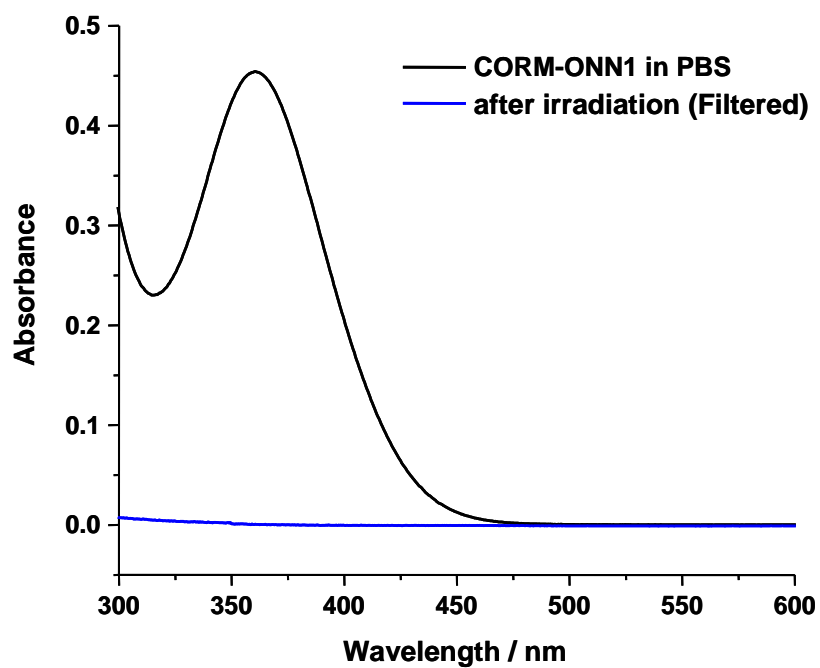

Figure S19: UV-VIS absorption spectrum of CORM-ONN1 in PBS (250  $\mu$ M) before and after irradiation.

## Molecule Representations:

Figure S20: Molecular structure and numbering scheme of  $[(\text{Pz}^{\text{Me}_2})_2\text{CH}_2]\text{Mn}(\text{CO})_3\text{Br}$  (**1B**, monoclinic modification). The ellipsoids represent a probability of 30 %. Hydrogen atoms are neglected for clarity reasons. Selected bond lengths (pm): Mn1-Br1 257.46(4), Mn1-N2 211.7(2), Mn1-N4 209.8(2), Mn1-C12 180.6(2), Mn1-C13 180.0(2), Mn1-C14 181.1(2), C12-O1 115.1(3), C13-O2 112.1(3), C14-O3 114.8(3); angles (deg.): Br1-Mn1-N2 96.01(5), Br1-Mn1-N4 92.48(5), Br1-Mn1-C12 84.57(7), Br1-Mn1-C13 173.20(8), Br1-Mn1-C14 83.65(7), N2-Mn1-N4 85.38(7), N2-Mn1-C12 96.49(9), N2-Mn1-C13 88.46(9), N2-Mn1-C14 178.60(9), N4-Mn1-C12 176.65(9), N4-Mn1-C13 92.99(9), N4-Mn1-C14 93.28(9), C12-Mn1-C13 89.84(10), C12-Mn1-C14 84.83(10), C13-Mn1-C14 92.00(10).

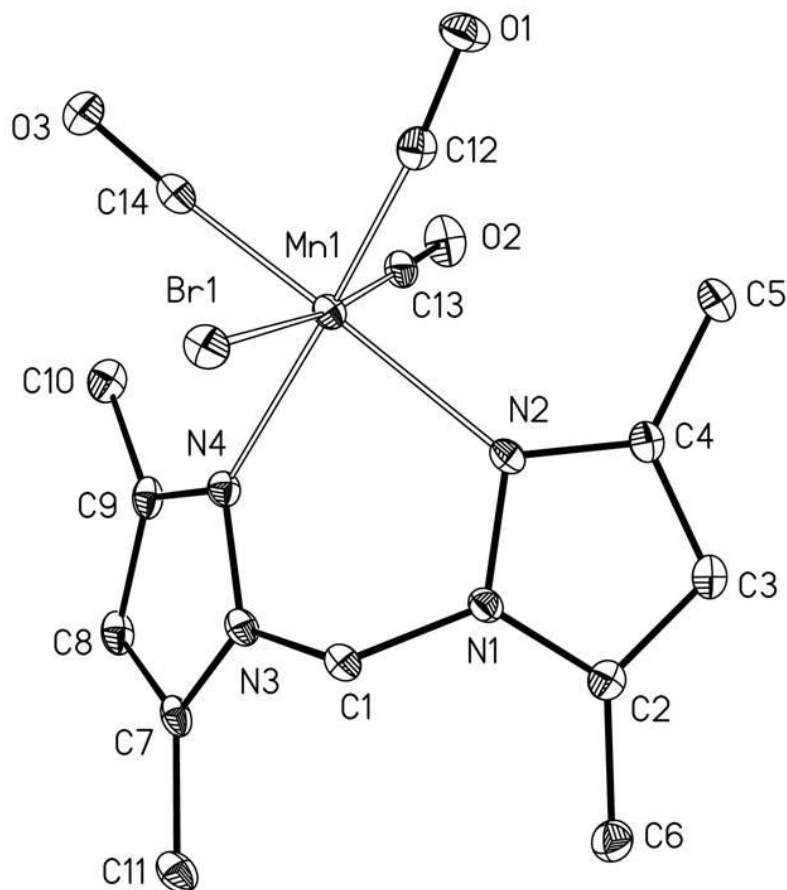

Figure S21: Structure and numbering scheme of the anion  $[\text{Mn}(\text{CO})_5]^-$  of iCORM **4**. The asymmetric unit contains two molecules A and B, only the anion of A is depicted. The ellipsoids represent a probability of 30 %. Selected bond lengths (pm) of anion A: Mn2-C25 179.3(3), Mn2-C26 179.8(3), Mn2-C27 181.2(3), Mn2-C28 181.8(3), Mn2-C29 182.1(4), C25-O3 116.4(4), C26-O4 116.0(4), C27-O5 115.2(4), C28-O6 115.8(4), C29-O7 115.4(4); angles (deg.): C25-Mn-C26 115.8(2), C25-Mn-C27 125.4(1), C26-Mn-C27 118.8(1), C25-Mn-C28 91.0(2), C25-Mn-C29 88.7(2), C26-Mn-C28 92.4(1), C26-Mn-C29 92.5(1), C27-Mn-C28 88.0(2), C27-Mn-C29 87.9(2), C28-Mn-C29 174.8(1).

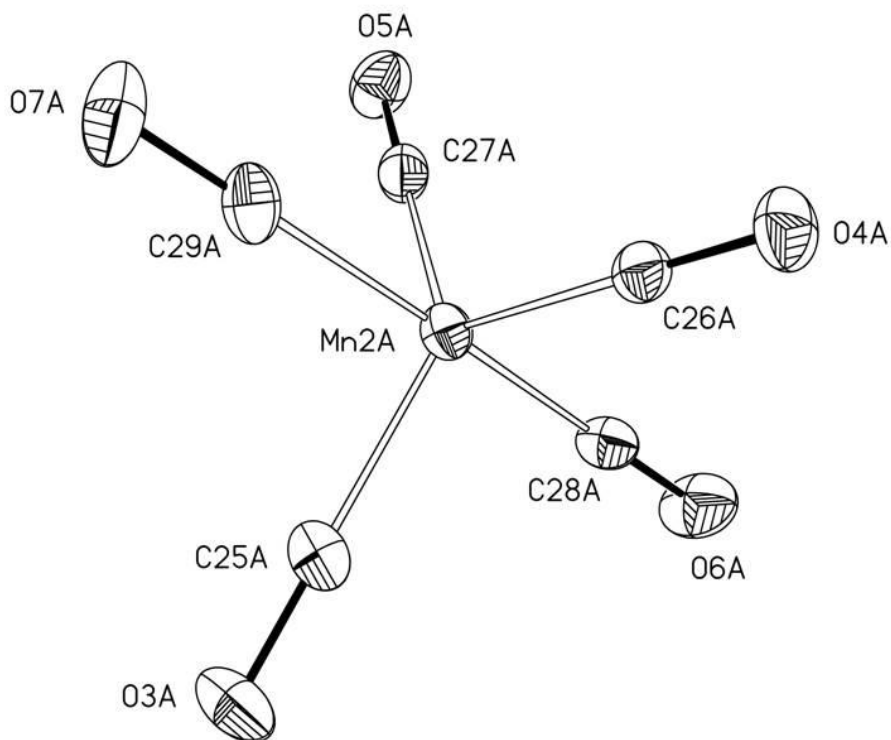

Figure S22: Ball-and-stick representation of the structure of iCORM **4**, the degradation product of CORM-ONN1. The atoms are drawn with arbitrary radii, carbon-bound hydrogen atoms are neglected for clarity reasons. In the middle the dinuclear cation is shown, hydrogen bridges are clarified by broken lines. The  $[\text{Mn}(\text{CO})_5]^-$  anions are located besides the complex cation without short distances between anion and cation.

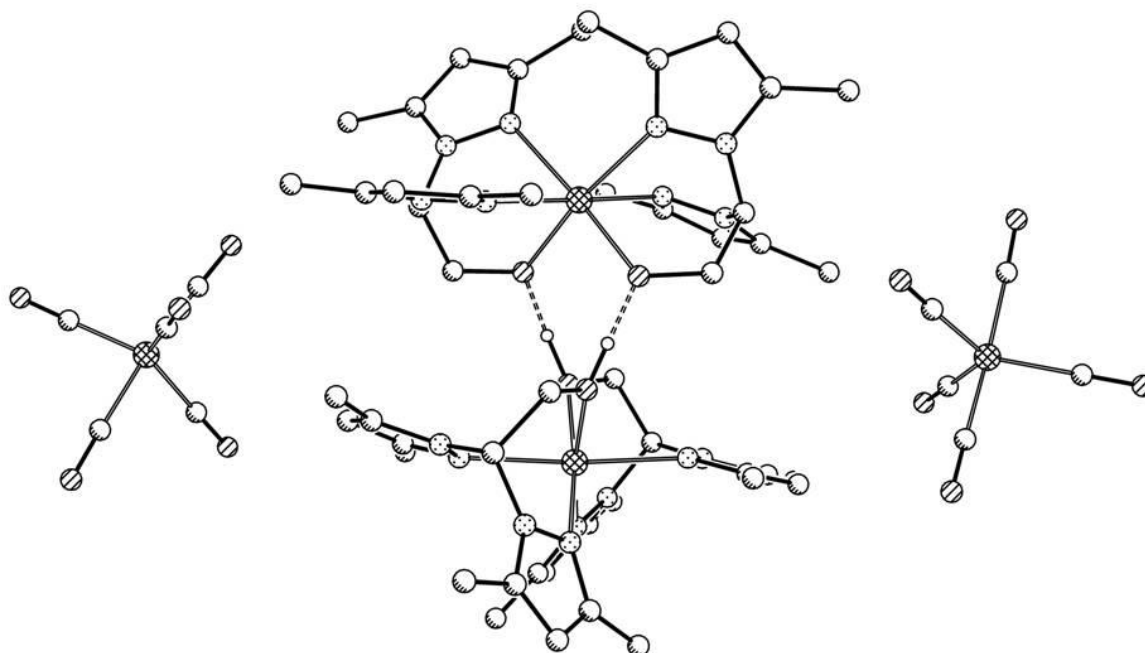



Figure S23: Molecular structure and numbering scheme of  $(Pz^{Me_2})_2CH-CH_2-OH$  (top) and aggregation via hydrogen bridges (bottom). The ellipsoids represent a probability of 30 %. Hydrogen atoms are shown with arbitrary radii. Selected bond lengths (pm): O1-C2 141.2(2), O1-H1<sub>O1</sub> 90(3), N1-C3 135.9(2), N1-N2 136.9(2), N1-C1 145.4(2), N2-C5 133.3(2), N3-C8 135.9(2), N3-N4 136.6(2), N3-C1 146.2(2), N4-C10 133.1(2), C1-C2 153.0(2), C3-C4 137.2(2), C3-C7 149.3(2), C4-C5 140.7(2), C5-C6 149.2(2), C8-C9 137.4(2), C8-C12 148.9(2), C9-C10 140.3(2), C10-C11 149.5(2).

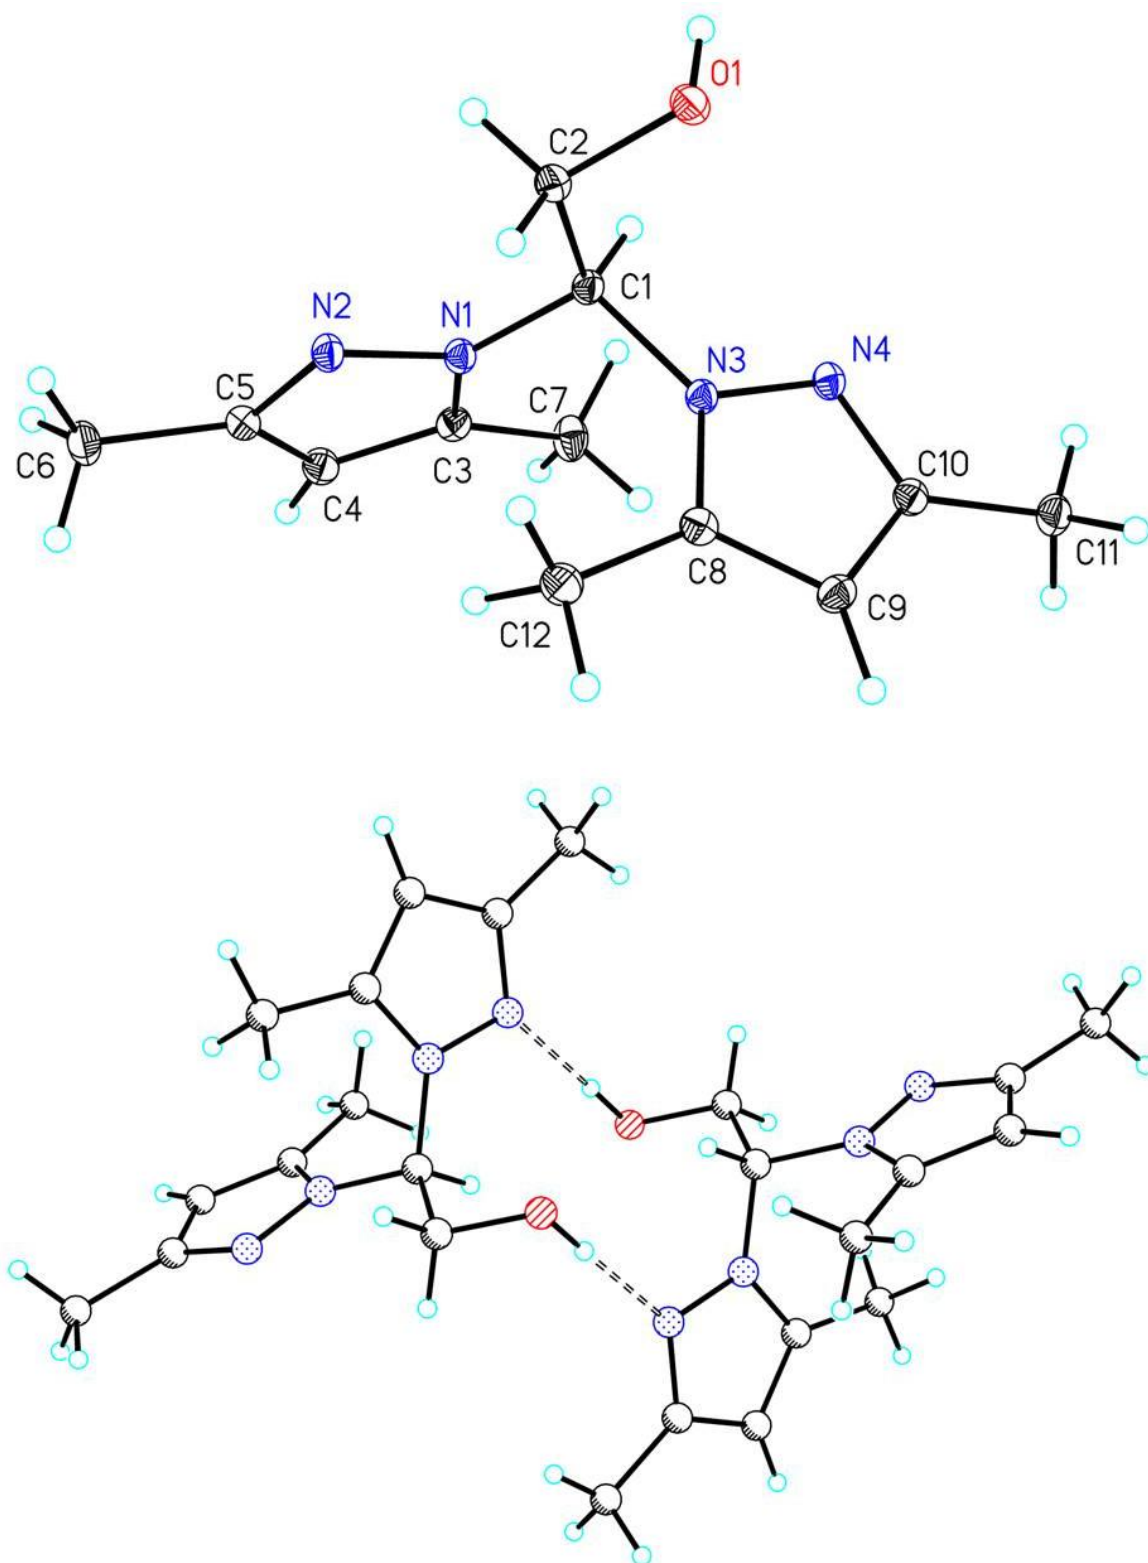

Table S2: Crystal data and refinement details for the X-ray structure determinations of the compounds **1** - **2**.

| Compound                                   | <b>1A</b>                                                         | <b>1B</b>                                                         | <b>2</b>                                                        |
|--------------------------------------------|-------------------------------------------------------------------|-------------------------------------------------------------------|-----------------------------------------------------------------|
| formula                                    | C <sub>14</sub> H <sub>16</sub> BrMnN <sub>4</sub> O <sub>3</sub> | C <sub>14</sub> H <sub>16</sub> BrMnN <sub>4</sub> O <sub>3</sub> | C <sub>15</sub> H <sub>15</sub> MnN <sub>4</sub> O <sub>5</sub> |
| fw (g·mol <sup>-1</sup> )                  | 423.16                                                            | 423.16                                                            | 386.25                                                          |
| °C                                         | -140(2)                                                           | -140(2)                                                           | -140(2)                                                         |
| crystal system                             | orthorhombic                                                      | monoclinic                                                        | triclinic                                                       |
| space group                                | P n m a                                                           | P 2 <sub>1</sub> /n                                               | P $\bar{1}$                                                     |
| <i>a</i> / Å                               | 10.0995(2)                                                        | 9.3065(3)                                                         | 8.1397(2)                                                       |
| <i>b</i> / Å                               | 14.5864(3)                                                        | 10.6722(3)                                                        | 10.3669(3)                                                      |
| <i>c</i> / Å                               | 11.3819(2)                                                        | 16.7643(5)                                                        | 10.7821(2)                                                      |
| $\alpha$ /°                                | 90                                                                | 90                                                                | 103.904(2)                                                      |
| $\beta$ /°                                 | 90                                                                | 98.598(1)                                                         | 111.361(1)                                                      |
| $\gamma$ /°                                | 90                                                                | 90                                                                | 91.846(1)                                                       |
| <i>V</i> /Å <sup>3</sup>                   | 1676.73(6)                                                        | 1646.33(9)                                                        | 815.25(3)                                                       |
| <i>Z</i>                                   | 4                                                                 | 4                                                                 | 2                                                               |
| $\rho$ (g·cm <sup>-3</sup> )               | 1.676                                                             | 1.707                                                             | 1.573                                                           |
| $\mu$ (cm <sup>-1</sup> )                  | 31.89                                                             | 32.48                                                             | 8.45                                                            |
| measured data                              | 3607                                                              | 11926                                                             | 6395                                                            |
| data with $I > 2\sigma(I)$                 | 1874                                                              | 3412                                                              | 3519                                                            |
| unique data ( $R_{int}$ )                  | 1980/0.0144                                                       | 3724/0.0343                                                       | 3667/0.0133                                                     |
| $wR_2$ (all data, on $F^2$ ) <sup>a)</sup> | 0.0461                                                            | 0.0660                                                            | 0.0606                                                          |
| $R_1$ ( $I > 2\sigma(I)$ ) <sup>a)</sup>   | 0.0214                                                            | 0.0281                                                            | 0.0256                                                          |
| $S$ <sup>b)</sup>                          | 1.101                                                             | 1.116                                                             | 1.046                                                           |
| Res. dens./e·Å <sup>-3</sup>               | 0.329/-0.253                                                      | 0.586/-0.509                                                      | 0.356/-0.337                                                    |
| absorpt method                             | multi-scan                                                        | multi-scan                                                        | multi-scan                                                      |
| absorpt corr $T_{min}/_{max}$              | 0.6543/0.7456                                                     | 0.6231/0.7456                                                     | 0.6996/0.7456                                                   |
| CCDC No.                                   | 1488835                                                           | 1488836                                                           | 1488837                                                         |

Table S2 (contd.): Crystal data and refinement details for the X-ray structure determinations of the compounds **3** -  $(\text{Pz}^{\text{Me}_2})_2\text{CH-CH}_2\text{OH}$ .

| Compound                                   | <b>3</b>                                             | <b>4</b>                                                    | $(\text{Pz}^{\text{Me}_2})_2\text{CH-CH}_2\text{OH}$ |
|--------------------------------------------|------------------------------------------------------|-------------------------------------------------------------|------------------------------------------------------|
| formula                                    | $\text{C}_{15}\text{H}_{18}\text{BrMnN}_4\text{O}_4$ | $\text{C}_{29}\text{H}_{35}\text{Mn}_2\text{N}_8\text{O}_7$ | $\text{C}_{12}\text{H}_{18}\text{N}_4\text{O}$       |
| fw ( $\text{g}\cdot\text{mol}^{-1}$ )      | 453.18                                               | 717.53                                                      | 234.30                                               |
| $^\circ\text{C}$                           | -140(2)                                              | -140(2)                                                     | -140(2)                                              |
| crystal system                             | monoclinic                                           | triclinic                                                   | triclinic                                            |
| space group                                | $\text{P } 2_1/c$                                    | $\text{P } \bar{1}$                                         | $\text{P } \bar{1}$                                  |
| $a/\text{Å}$                               | 13.8488(2)                                           | 11.6573(3)                                                  | 7.4242(2)                                            |
| $b/\text{Å}$                               | 11.0641(3)                                           | 14.7441(3)                                                  | 8.6729(3)                                            |
| $c/\text{Å}$                               | 11.6952(2)                                           | 20.6894(5)                                                  | 10.7671(4)                                           |
| $\alpha/^\circ$                            | 90                                                   | 85.371(2)                                                   | 99.558(2)                                            |
| $\beta/^\circ$                             | 98.380(1)                                            | 81.709(1)                                                   | 103.319(2)                                           |
| $\gamma/^\circ$                            | 90                                                   | 69.787(1)                                                   | 111.723(2)                                           |
| $V/\text{Å}^3$                             | 1772.86(6)                                           | 3300.32(13)                                                 | 602.02(3)                                            |
| $Z$                                        | 4                                                    | 4                                                           | 2                                                    |
| $\rho$ ( $\text{g}\cdot\text{cm}^{-3}$ )   | 1.698                                                | 1.444                                                       | 1.293                                                |
| $\mu$ ( $\text{cm}^{-1}$ )                 | 30.26                                                | 8.22                                                        | .86                                                  |
| measured data                              | 12429                                                | 38249                                                       | 3831                                                 |
| data with $I > 2\sigma(I)$                 | 3679                                                 | 11312                                                       | 2392                                                 |
| unique data ( $R_{\text{int}}$ )           | 4031/0.0270                                          | 14363/0.0360                                                | 2718/0.0217                                          |
| $wR_2$ (all data, on $F^2$ ) <sup>a)</sup> | 0.0565                                               | 0.1316                                                      | 0.1187                                               |
| $R_1$ ( $I > 2\sigma(I)$ ) <sup>a)</sup>   | 0.0248                                               | 0.0488                                                      | 0.0514                                               |
| $S$ <sup>b)</sup>                          | 1.063                                                | 1.057                                                       | 1.070                                                |
| Res. dens./ $e\cdot\text{Å}^{-3}$          | 0.365/-0.354                                         | 0.795/-1.004                                                | 0.282/-0.261                                         |
| absorpt method                             | multi-scan                                           | multi-scan                                                  | multi-scan                                           |
| absorpt corr $T_{\text{min}}/\text{max}$   | 0.6705/0.7456                                        | 0.6329/0.7456                                               | 0.6782/0.7456                                        |
| CCDC No.                                   | 1488838                                              | 1488839                                                     | 1505640                                              |

<sup>a)</sup> Definition of the  $R$  indices:  $R_1 = (\sum ||F_o| - |F_c||) / \sum |F_o|$ ;

$wR_2 = \{\sum [w(F_o^2 - F_c^2)^2] / \sum [w(F_o^2)^2]\}^{1/2}$  with  $w^{-1} = \sigma^2(F_o^2) + (aP)^2 + bP$ ;  $P = [2F_c^2 + \text{Max}(F_o^2)]/3$ ;

<sup>b)</sup>  $S = \{\sum [w(F_o^2 - F_c^2)^2] / (N_o - N_p)\}^{1/2}$ .
